# Supplementary material
Source: MDPI journal article supplement (https://www.mdpi.com/2227-9717/11/10/2886)
Supplement: s1 [file s1]

## Supplementary Materials

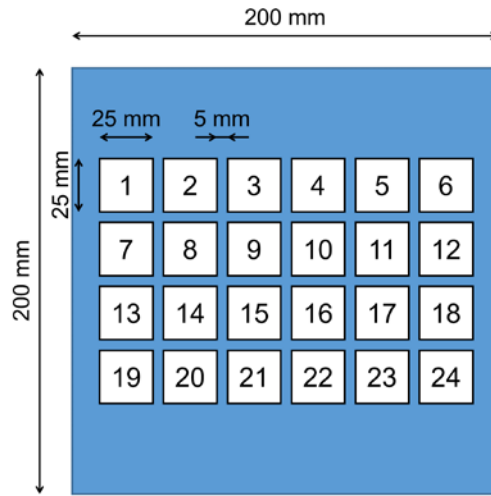

**Figure S1.** Schematic top view of the arrangement of the 24 samples of tylose gel (white) on the product support (blue).

**Table S1.** Average forward power and average chamber pressure in the experiments comparing termination criteria.

| Experiment             | Average forward Power $\bar{P}_f$ / W | Average Chamber Pressure $\bar{p}_c$ / mbar |
|------------------------|---------------------------------------|---------------------------------------------|
| Partial drying - run 1 | 28.57                                 | 0.47                                        |
| Partial drying - run 2 | 29.22                                 | 0.47                                        |
| Partial drying - run 3 | 28.34                                 | 0.46                                        |
| Complete drying        | 20.61                                 | 0.50                                        |

**Table S2.** Average forward power and average chamber pressure in the experiments of the parameter study on chamber pressure.

| Experiment                   | Average Forward Power $\bar{P}_f$ / W | Average Chamber Pressure $\bar{p}_c$ / mbar |
|------------------------------|---------------------------------------|---------------------------------------------|
| $p_{set} = 0.2$ mbar - run 1 | 16.86                                 | 0.19                                        |
| $p_{set} = 0.2$ mbar - run 2 | 13.52                                 | 0.19                                        |
| $p_{set} = 0.2$ mbar - run 3 | 15.03                                 | 0.19                                        |
| $p_{set} = 0.5$ mbar - run 1 | 17.36                                 | 0.47                                        |
| $p_{set} = 0.5$ mbar - run 2 | 18.02                                 | 0.47                                        |
| $p_{set} = 0.5$ mbar - run 3 | 17.90                                 | 0.47                                        |
| $p_{set} = 1.0$ mbar - run 1 | 14.26                                 | 0.87                                        |
| $p_{set} = 1.0$ mbar - run 2 | 16.17                                 | 0.87                                        |
| $p_{set} = 1.0$ mbar - run 3 | 14.59                                 | 0.87                                        |

**Table S3.** Average forward power and average chamber pressure in the experiments of the parameter study on microwave power.

| <b>Experiment</b>       | <b>Average Forward Power <math>\bar{P}_f</math> / W</b> | <b>Average Chamber Pressure <math>\bar{p}_c</math> / mbar</b> |
|-------------------------|---------------------------------------------------------|---------------------------------------------------------------|
| $r_{on} = 0.25$ - run 1 | 17.36                                                   | 0.47                                                          |
| $r_{on} = 0.25$ - run 2 | 18.02                                                   | 0.47                                                          |
| $r_{on} = 0.25$ - run 3 | 17.90                                                   | 0.47                                                          |
| $r_{on} = 0.50$ - run 1 | 42.02                                                   | 0.47                                                          |
| $r_{on} = 0.50$ - run 2 | 46.21                                                   | 0.46                                                          |
| $r_{on} = 0.50$ - run 3 | 24.64                                                   | 0.47                                                          |
| $r_{on} = 0.75$ - run 1 | 42.49                                                   | 0.47                                                          |
| $r_{on} = 0.75$ - run 2 | 53.15                                                   | 0.47                                                          |
| $r_{on} = 0.75$ - run 3 | 48.17                                                   | 0.47                                                          |
| $r_{on} = 0.75$ - run 4 | 36.74                                                   | 0.47                                                          |
| $r_{on} = 1.00$ - run 1 | 35.13                                                   | 0.47                                                          |
| $r_{on} = 1.00$ - run 2 | 46.83                                                   | 0.47                                                          |
| $r_{on} = 1.00$ - run 3 | 46.88                                                   | 0.47                                                          |
| $r_{on} = 1.00$ - run 4 | 40.64                                                   | 0.47                                                          |

**Table S4.** Average forward power and average chamber pressure in the experiments of the parameter study on microwave frequency.

| <b>Experiment</b> | <b>Average Forward Power <math>\bar{P}_f</math> / W</b> | <b>Average Chamber Pressure <math>\bar{p}_c</math> / mbar</b> |
|-------------------|---------------------------------------------------------|---------------------------------------------------------------|
| 1MF - run 1       | 19.00                                                   | 0.46                                                          |
| 1MF - run 2       | 18.14                                                   | 0.47                                                          |
| 1MF - run 3       | 18.31                                                   | 0.46                                                          |
| 1RF - run 1       | 27.53                                                   | 0.45                                                          |
| 1RF - run 2       | 28.05                                                   | 0.47                                                          |
| 1RF - run 3       | 26.59                                                   | 0.47                                                          |
| 6EF - run 1       | 28.57                                                   | 0.47                                                          |
| 6EF - run 2       | 29.22                                                   | 0.47                                                          |
| 6EF - run 3       | 28.34                                                   | 0.46                                                          |
| 6RF - run 1       | 32.95                                                   | 0.47                                                          |
| 6RF - run 2       | 33.31                                                   | 0.47                                                          |
| 6RF - run 3       | 31.25                                                   | 0.47                                                          |

**Table S5.** Applied frequencies during the parameter studies on chamber pressure and microwave power.

| <b>Set Chamber Pressure</b> |        |        |        |
|-----------------------------|--------|--------|--------|
| $p_{c,set}$ / mbar          | 0.2    | 0.5    | 1.0    |
| Frequency $f_1$ / MHz       | 2441.3 | 2449.6 | 2449.6 |
| Frequency $f_2$ / MHz       | 2450.0 | 2456.2 | 2456.1 |
| Frequency $f_3$ / MHz       | 2456.3 | 2467.3 | 2464.6 |
| Frequency $f_4$ / MHz       | 2468.4 | 2470.7 | 2472.5 |
| Frequency $f_5$ / MHz       | 2470.2 | 2475.1 | 2475.2 |
| Frequency $f_6$ / MHz       | 2475.9 | 2497.2 | 2497.1 |

**Table S6.** Applied frequencies during the parameter study on microwave frequency.

| <b>Control Concept</b> | <b>1MF</b> | <b>1RF</b> | <b>6EF</b> | <b>6RF</b> |
|------------------------|------------|------------|------------|------------|
| Frequency $f_1$ / MHz  | 2432.0     | 2449.8     | 2400.0     | 2449.7     |
| Frequency $f_2$ / MHz  | -          | -          | 2420.0     | 2456.2     |
| Frequency $f_3$ / MHz  | -          | -          | 2440.0     | 2465.2     |
| Frequency $f_4$ / MHz  | -          | -          | 2460.0     | 2466.4     |
| Frequency $f_5$ / MHz  | -          | -          | 2480.0     | 2472.5     |
| Frequency $f_6$ / MHz  | -          | -          | 2500.0     | 2474.8     |

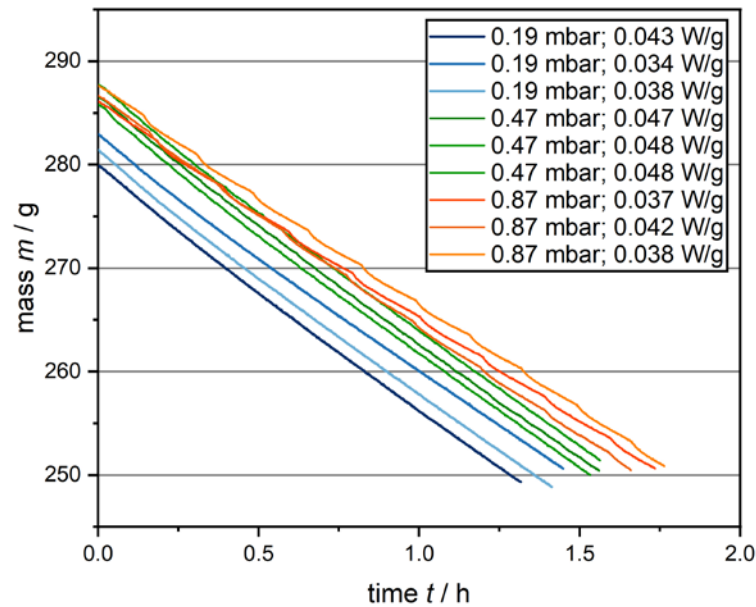

**Figure S2.** Drying kinetics for experiments of the parameter study on chamber pressure. The values in the legend represent the average chamber pressure and the average specific dissipated power for the experiments.

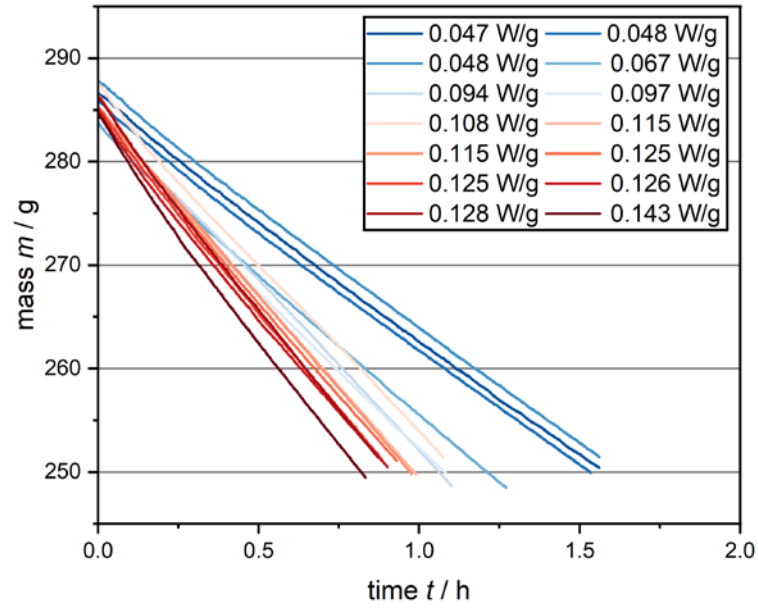

**Figure S3.** Drying kinetics for experiments of the parameter study on microwave power. The powers in the legend are the average specific dissipated power for every experiment.

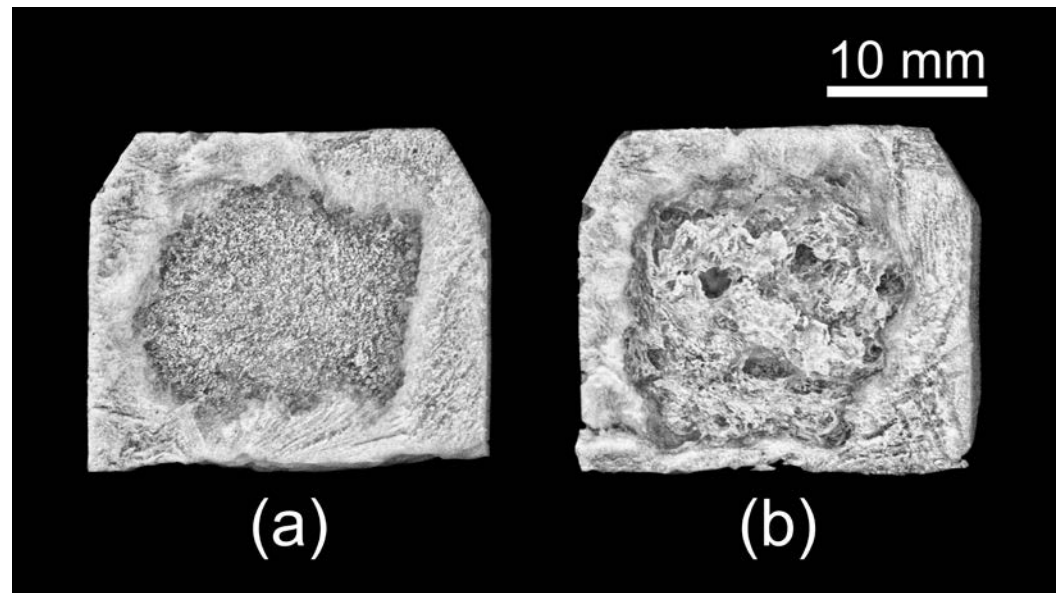

**Figure S4.** Exemplary pictures of tylose gel samples in gray-scale: (a) Intact sample, (b) puffed sample. While both samples show a fine-pored structure in the dried outer layer, large pores in the center of the sample can only be observed for the puffed sample.

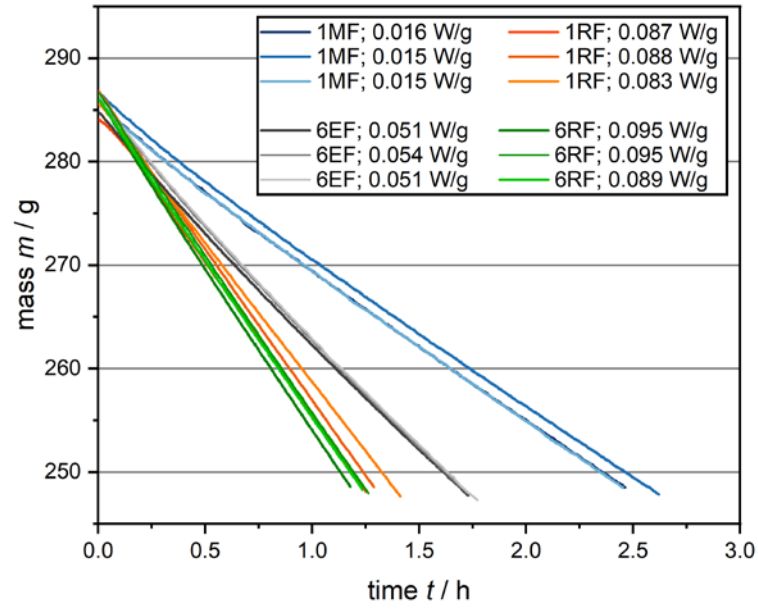

**Figure S5.** Drying kinetics for the frequency-based control concepts in the parameter study on microwave frequency. The legend contains the frequency-based control concepts and the average specific dissipated powers for every experiment.
